# Supplementary material for: Investigating Crosstalk Among PTMs Provides Novel Insight Into the Structural Basis Underlying the Differential Effects of Nt17 PTMs on Mutant Httex1 Aggregation
Source: PubMed Central journal article supplement (PMC8352439; doi:10.3389/fmolb.2021.686086), 2021-07-26
Supplement: DataSheet1.pdf [file DataSheet1.pdf]

*Supplementary Material*

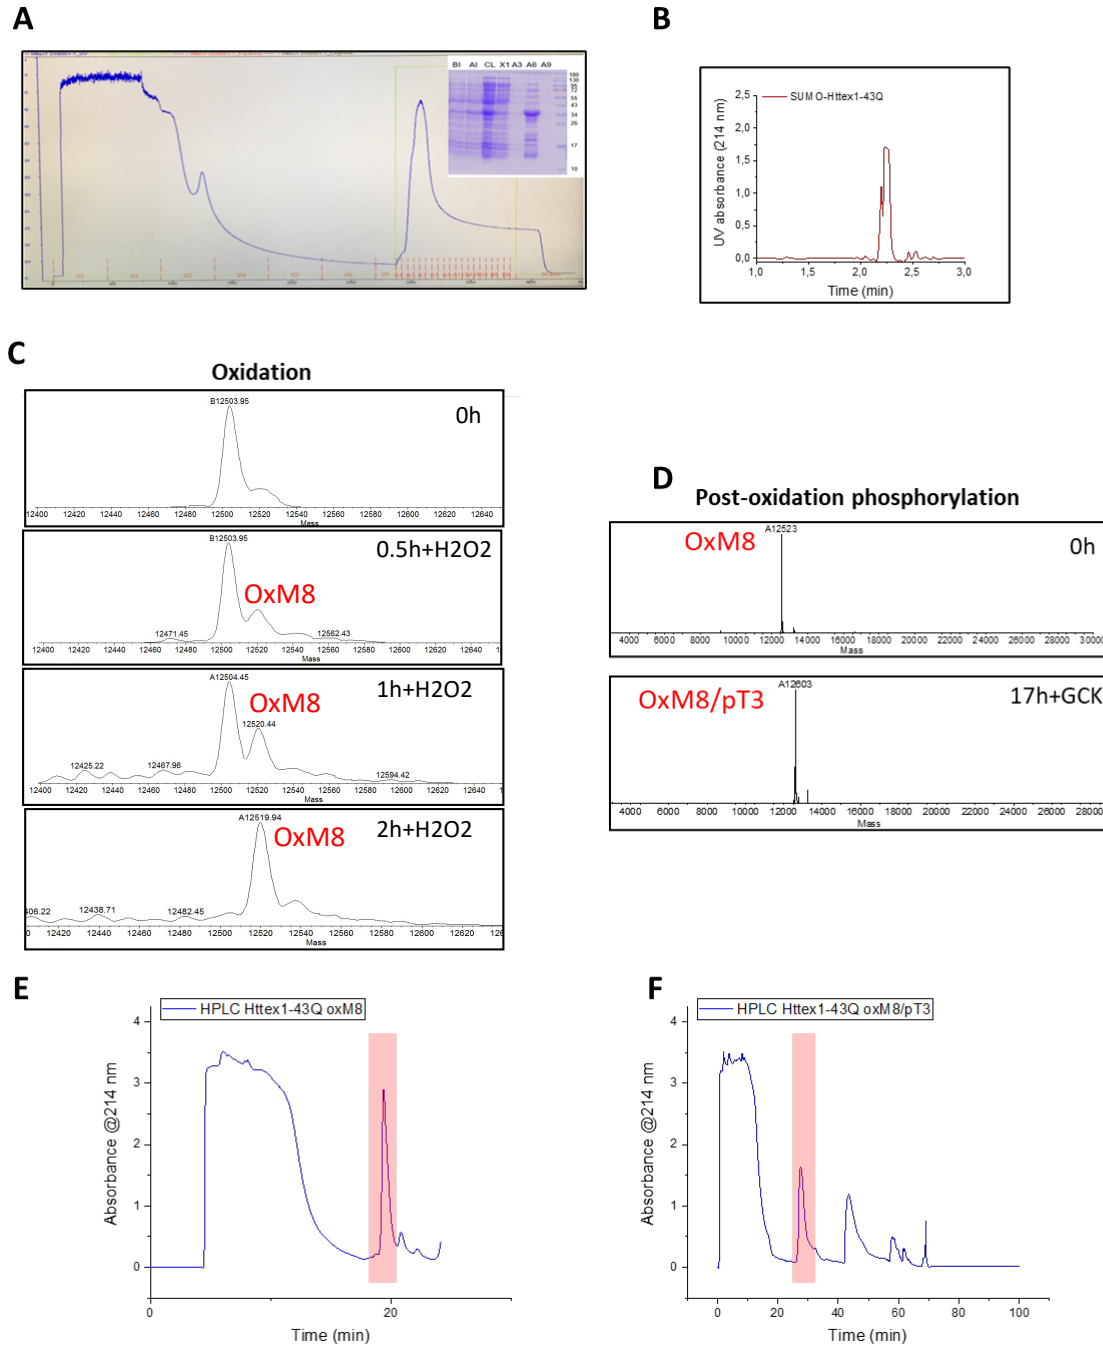

**Figure S1.** (A) Representative chromatogram of the IMAC purification of SUMO-mHttex1 and the analysis by SDS-PAGE of the purification fractions. (B) Analysis by UPLC of the fusion SUMO-mHttex1 after IMAC purifications. (C) Monitoring by ESI/MS of SUMO-mHttex1 oxidation by H<sub>2</sub>O<sub>2</sub> overtime after an analytical SUMO tag cleavage by ULP1. (D) Monitoring of SUMO-mHttex1 phosphorylation by GCK after an analytical SUMO tag cleavage by ULP1. (E-F) RP-HPLC chromatograms for the purification of mHttex1 oxM8 (E) and mHttex1 oxM8/pT3 (F). (protein of interest is highlighted in red).

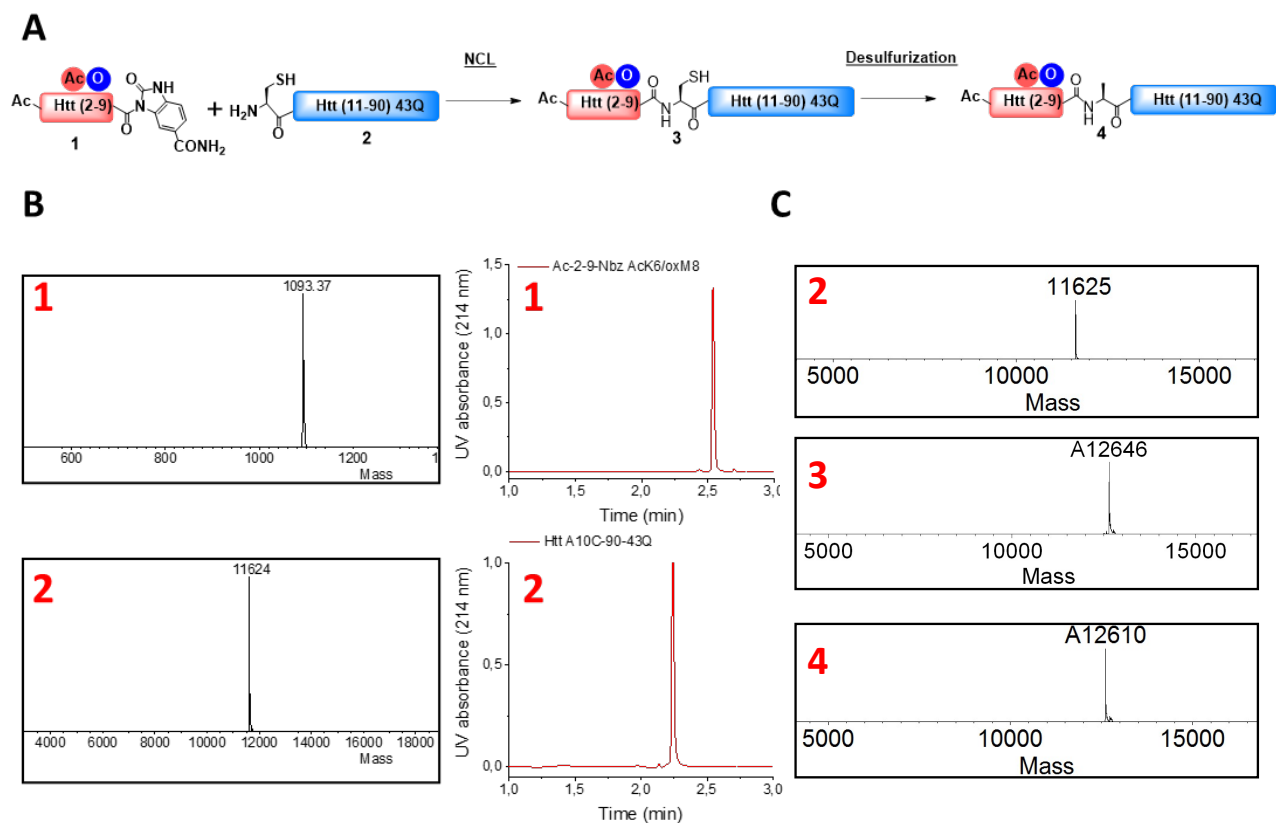

**Figure S2.** (A) Schematic representation for the semisynthetic strategy used for the generation of mHttex1-oxM8/AcK6 (4) (adapted from [30]). (B) Characterization by ESI/MS and UPLC of Htt Ac-2-9-Nbz oxM8/AcK6 (1) and Htt A10C-90 43Q (2), both are the starting material for the semi-synthesis. The native chemical ligation of (1) and (2) was performed in (8 M urea, 0.5 M L-Proline, 30 mM D-Trehalose, 100 mM TCEP, pH 7), and the ligation was monitored by ESI/MS (C). When the NCL was completed, the reaction solution containing Httex1-43Q-oxM8/AcK6 A10C (3) was dialyzed and lyophilized and then desulfurized in 100 mM TCEP, 40 mM L-methionine, 20 vol% acetic acid in H<sub>2</sub>O pH 1, the desulfurization of Cys to Ala was monitored by ESI/MS.

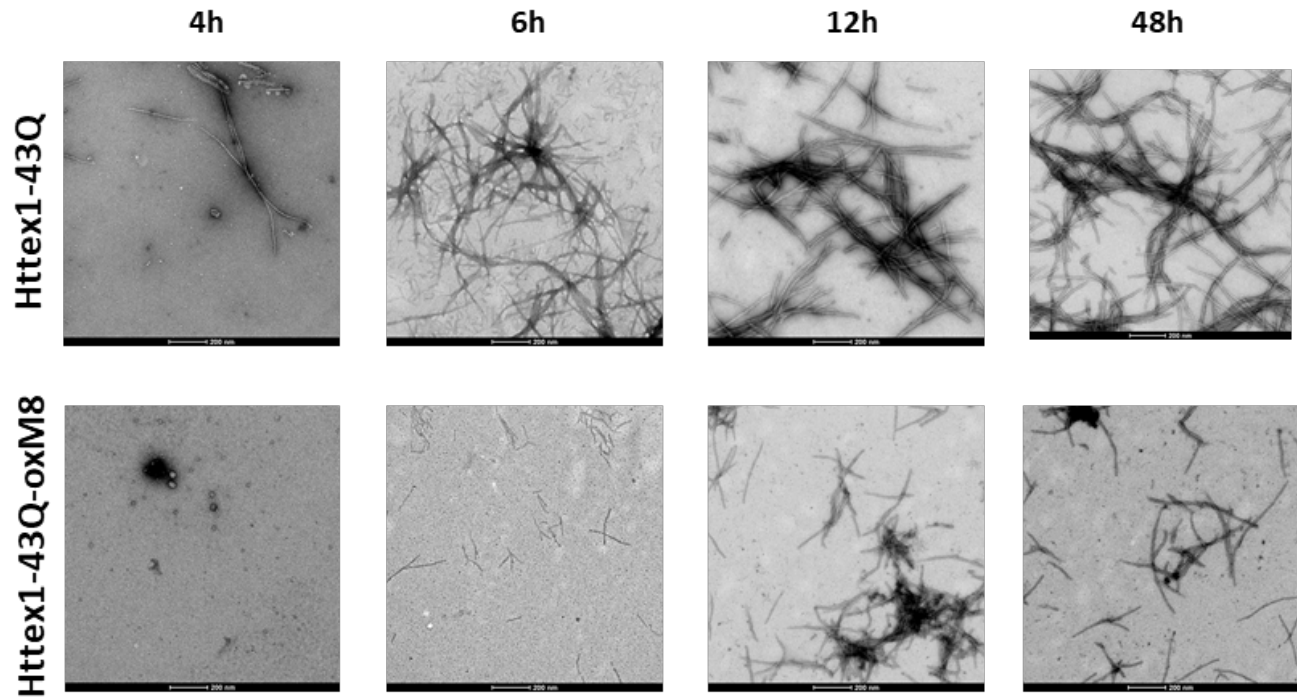

**Figure S3.** Over-time aggregation monitoring by electron microscopy of Httex1-43Q-oxM8 compared to unmodified Httex1-43Q (at 10  $\mu$ M).

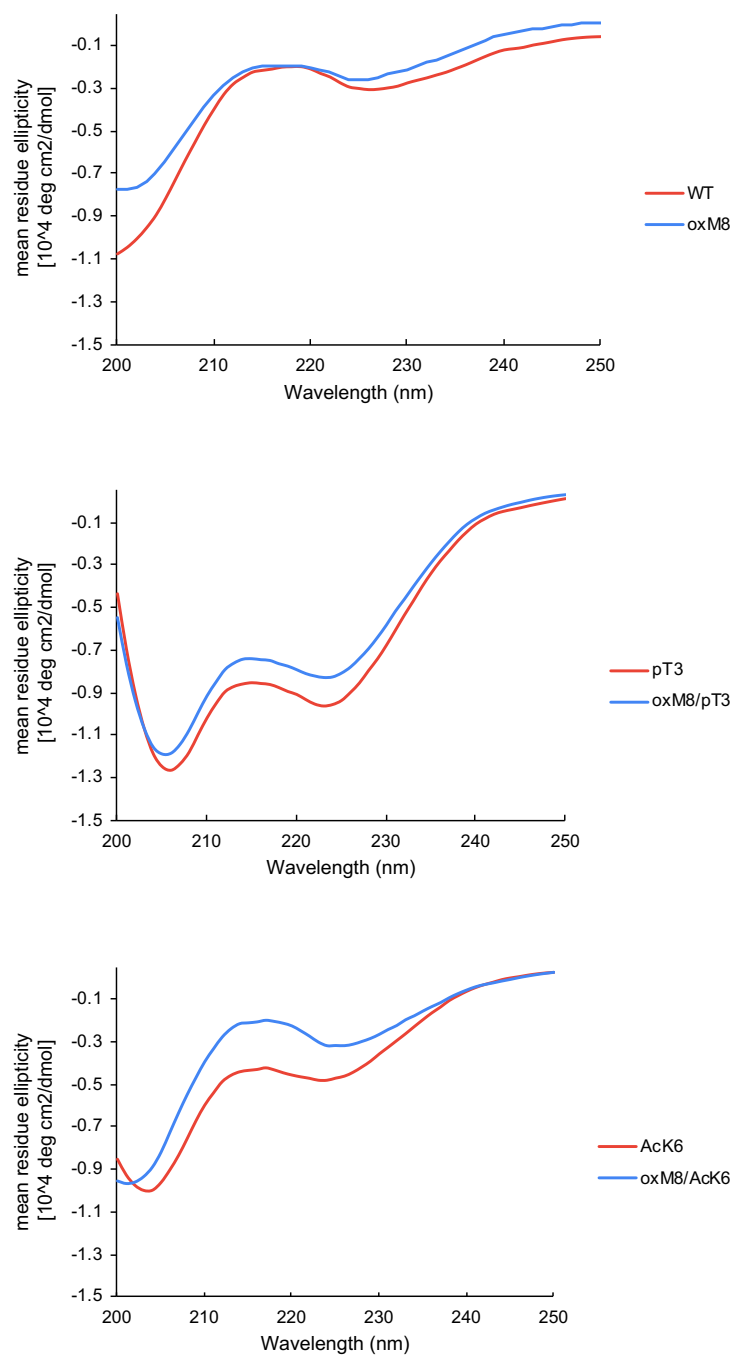

**Figure S4.** Far-UV CD spectra of Nt17-WT, and Nt17-oxM8, Nt17-AcK6, Nt17-AcK6/oxM8, Nt17-pT3 and Nt17-pT3/oxM8 at 60  $\mu$ M.

**Table S1:** Helical content (%) calculated from 3 repeats for the different peptides at 60  $\mu\text{M}$ .

| <b>Nt17 peptide</b> | <b>CD Helical content (%)</b> |
|---------------------|-------------------------------|
| WT                  | $0.1 \pm 0.1$                 |
| oxM8                | $1.7 \pm 0.5$                 |
| pT3                 | $21.8 \pm 0.7$                |
| pT3/oxM8            | $18.9 \pm 0.5$                |
| AcK6                | $5.0 \pm 0.2$                 |
| AcK6/oxM8           | $1.6 \pm 0.2$                 |

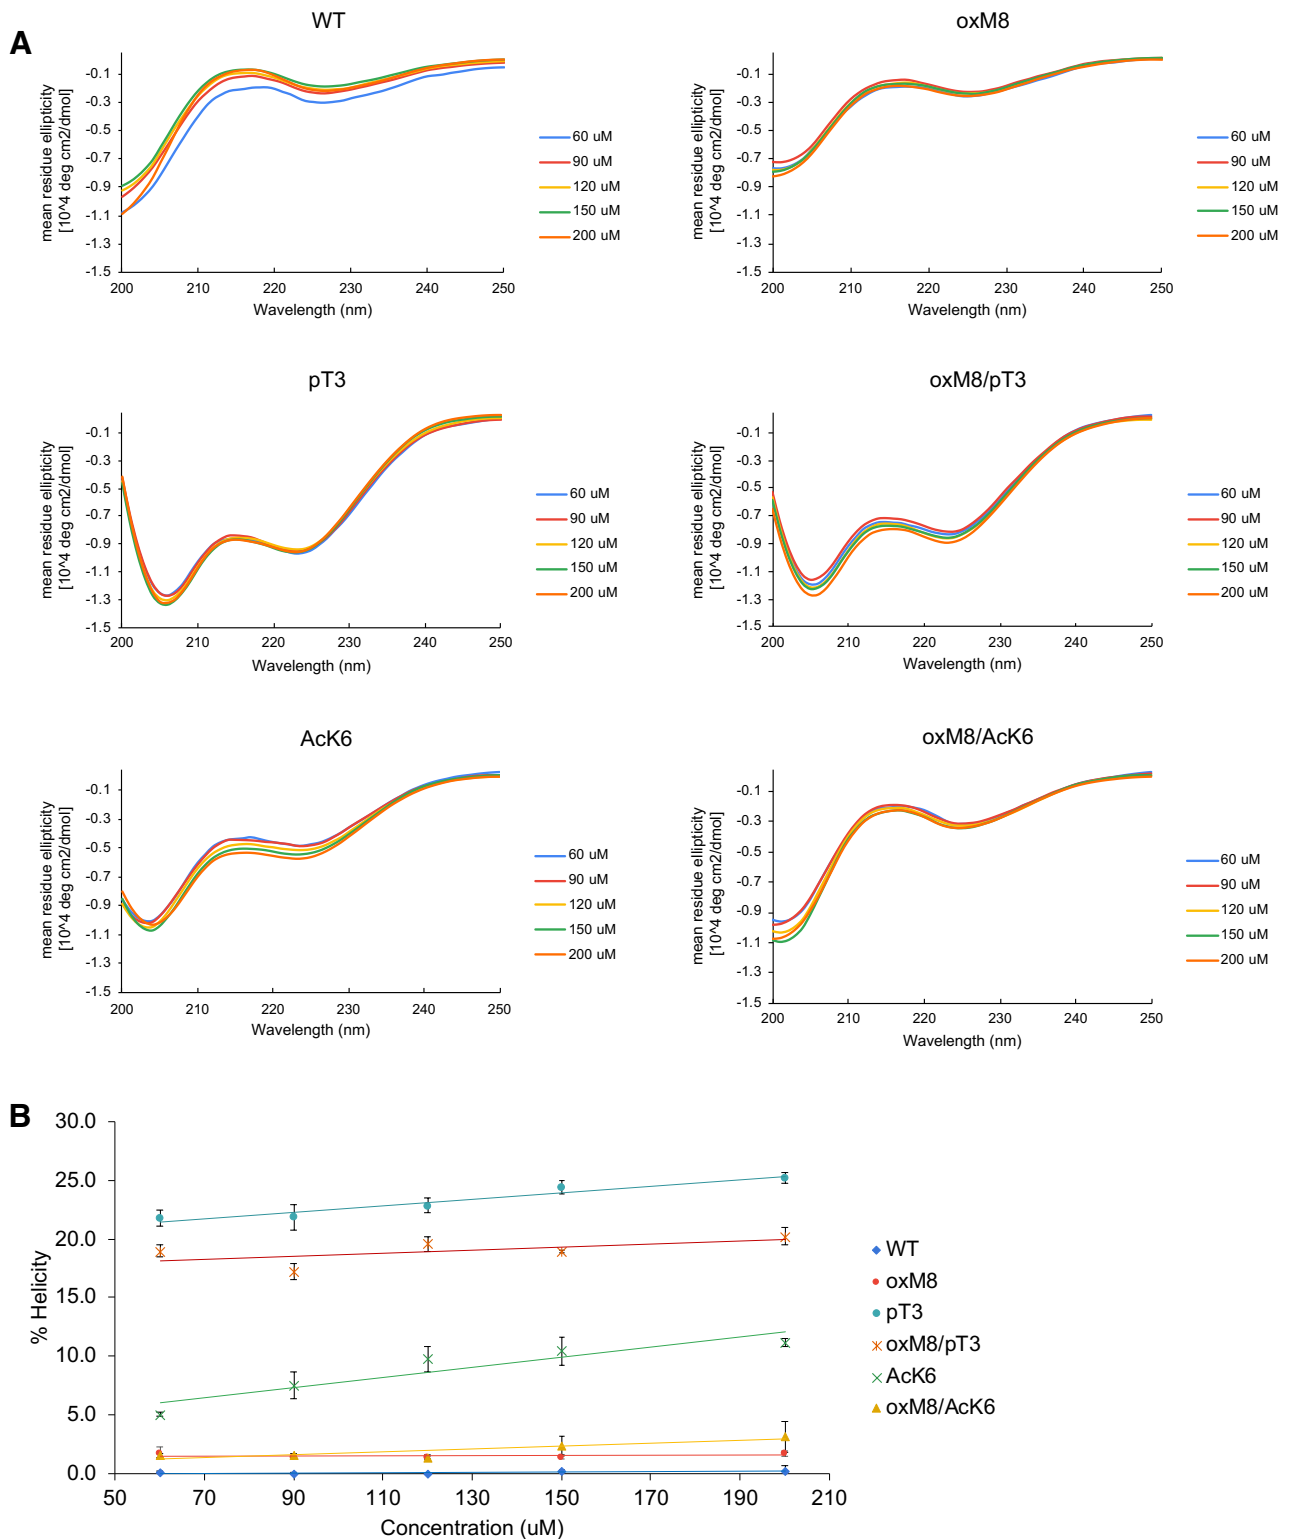

**Figure S5. (A)** Far-UV CD spectra of Nt17-WT, and Nt17-oxM8, Nt17-AcK6, Nt17-AcK6/oxM8, Nt17-pT3 and Nt17-pT3/oxM8 at 60, 90, 120, 150, and 200  $\mu\text{M}$ . **(B)** Helical content for the peptides in the function of the different concentrations. The error bars indicate the standard deviations calculated from 3 repeats.

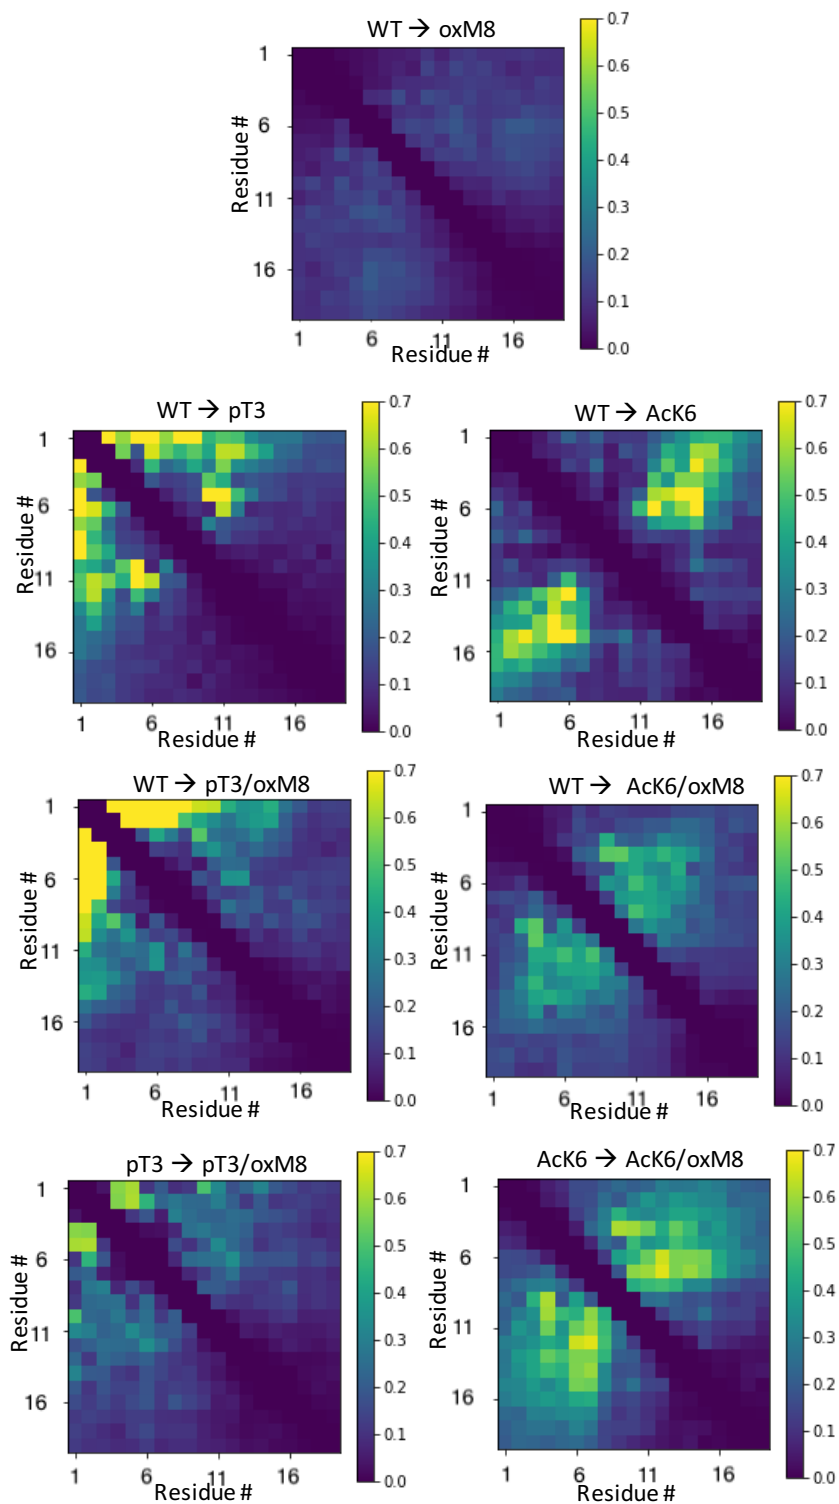

**Figure S6. The Kullback–Leibler divergence of pairwise distances of  $C\alpha$ .** For each MD of Nt19, the distances between all pairs of  $C\alpha$  in Nt19 were calculated. The differences in residue-residue contact were quantified using the Kullback-Leibler divergence from its reference histogram of distances.
